# Supplementary material for: Simple Scores of Fibrosis and Mortality in Patients with NAFLD: A Systematic Review with Meta-Analysis
Source: J Clin Med. 2018 Aug 15;7(8):219. doi: 10.3390/jcm7080219 (PMC6111765; doi:10.3390/jcm7080219)

## Methods

### Statistical analysis

Dose-response meta-analysis was modeled by using restricted cubic splines with 3 knots at fixed percentiles (25%, 50%, and 75%) of the distribution.

In order to combine categories of exposure to obtain identical categories across considered studies for each type of score, approach set out in Hamling et al was used [Hamling J, Lee P, Weitkunat R, Ambuhl M. Facilitating meta-analyses by deriving relative effect and precision estimates for alternative comparisons from a set of estimates presented by exposure level + or disease category. *Statistics in medicine* 2008;27(7):954-70. doi: 10.1002/sim.3013.].

Briefly, the standard errors and confidence intervals were re-calculated consistently for each rescaled risk estimate based on the adjusted results presented in the papers. To perform dose-response meta-analysis data on the level of NFS, APRI and FIB-4 score, distributions of cases and participants (when available), and ORs/HRs with 95% CIs for  $\geq 3$  categories of score were extracted. The midpoint of the range in each category of each score was assigned to the corresponding OR/HR with the 95% CI for each study. When the highest category was open ended, we assumed the width of the category to be the same as the adjacent category. When the lowest category was open ended, we set the lower boundary to zero.

**Supplementary table 1.** Total number of participants and number of cases (deaths) for each study included in the meta-analysis evaluating the risk of mortality according to NAFLD fibrosis score, APRI and FIB-4 values

***NAFLD fibrosis score***

| Author, year         | Score categories | n    | Cases | Non cases |
|----------------------|------------------|------|-------|-----------|
| Treeprasertsuk, 2013 | < -1.455         | 181  | 12    | 169       |
| "                    | -1.455 to 0.676  | 108  | 21    | 87        |
| "                    | > 0.676          | 13   | 6     | 7         |
| Angulo, 2013         | < -1.455         | 125  | 5     | 120       |
| "                    | -1.455 to 0.676  | 120  | 20    | 100       |
| "                    | > 0.676          | 75   | 16    | 59        |
| Xun, 2014            | < -1.455         | 129  | 4     | 125       |
| "                    | -1.455 to 0.676  | 39   | 4     | 35        |
| "                    | > 0.676          | 12   | 4     | 8         |
| Sebastiani, 2015     | ≤ 0.676          | NA   | NA    | NA        |
| "                    | > 0.676          | NA   | NA    | NA        |
| Le, 2017             | < -1.455         | 739  | 21    | 718       |
| "                    | -1.455 to 0.676  | 919  | 107   | 812       |
| "                    | > 0.676          | 245  | 86    | 159       |
| Unalp-Arida, 2017    | < -1.455         | 9073 | 1318  | 7755      |
| "                    | -1.455 to 0.676  | 4413 | 2328  | 2085      |
| "                    | > 0.676          | 1255 | 1032  | 223       |

NA, not available

***APRI***

| Author, year     | Score categories | n   | Cases | Non cases |
|------------------|------------------|-----|-------|-----------|
| Kim, 2013        | < 0.5            | NA  | NA    | NA        |
| "                | 0.5 to 1.5       | NA  | NA    | NA        |
| "                | > 1.5            | NA  | NA    | NA        |
| Angulo, 2013     | < 0.5            | 93  | 9     | 84        |
| "                | 0.5 to 1.5       | 169 | 17    | 152       |
| "                | > 1.5            | 58  | 15    | 43        |
| Sebastiani, 2015 | < 1.5            | NA  | NA    | NA        |
| "                | > 1.5            | NA  | NA    | NA        |

NA, not available

**FIB-4**

| Author, year      | Score categories | n     | Cases | Non cases |
|-------------------|------------------|-------|-------|-----------|
| Kim, 2013         | < 1.3            | NA    | NA    | NA        |
| "                 | 1.3 to 2.67      | NA    | NA    | NA        |
| "                 | > 2.67           | NA    | NA    | NA        |
| Angulo, 2013      | < 1.3            | 111   | 6     | 105       |
| "                 | 1.3 to 2.67      | 117   | 14    | 103       |
| "                 | > 2.67           | 92    | 21    | 71        |
| Unalp-Arida, 2017 | < 1.3            | 10824 | 1881  | 8943      |
| "                 | 1.3 to 2.67      | 3416  | 2317  | 1099      |
| "                 | > 2.67           | 601   | 524   | 77        |

NA, not available

**Supplementary table 2.** Dose-response meta-analysis using splines with knots at quartiles (0.25, 0.50, 0.75 quartiles) assessing the risk of mortality according to NAFLD fibrosis score, APRI and FIB-4 values.

| Score                | Dose category   | Dose midpoint | RR (95% CI)       | Number of studies | I <sup>2</sup> | p heterogeneity |
|----------------------|-----------------|---------------|-------------------|-------------------|----------------|-----------------|
| NAFLD fibrosis score |                 |               |                   |                   |                |                 |
|                      | < -1.455        | -2.5          | 1.00 (ref.)       | 6                 | 93.69          | < 0.01          |
|                      | -1.455 to 0.676 | -0.5          | 2.20 (1.31-3.70)  |                   |                |                 |
|                      | > 0.676         | 1.5           | 5.16 (2.02-13.16) |                   |                |                 |
| APRI                 |                 |               |                   |                   |                |                 |
|                      | < 0.5           | 0             | 1.00 (ref.)       | 1                 | -              | -               |
|                      | 0.5 to 1.5      | 1             | 1.11 (0.3-4.11)   |                   |                |                 |
|                      | > 1.5           | 2             | 3.14 (0.88-11.14) |                   |                |                 |
| FIB-4                |                 |               |                   |                   |                |                 |
|                      | < 1.3           | 0.5           | 1.00 (ref.)       | 2                 | 78.8           | 0.01            |
|                      | 1.3 to 2.67     | 2             | 1.39 (0.67-2.89)  |                   |                |                 |
|                      | > 2.67          | 3.5           | 3.04 (0.51-18.12) |                   |                |                 |

**Supplementary figure 1.** PRISMA (Preferred Reporting Items for Systematic Reviews and Meta-Analyses) checklist

| Section/topic                      | #  | Checklist item                                                                                                                                                                                                                                                                                              | Reported on page # |
|------------------------------------|----|-------------------------------------------------------------------------------------------------------------------------------------------------------------------------------------------------------------------------------------------------------------------------------------------------------------|--------------------|
| <b>TITLE</b>                       |    |                                                                                                                                                                                                                                                                                                             |                    |
| Title                              | 1  | Identify the report as a systematic review, meta-analysis, or both.                                                                                                                                                                                                                                         | 1                  |
| <b>ABSTRACT</b>                    |    |                                                                                                                                                                                                                                                                                                             |                    |
| Structured summary                 | 2  | Provide a structured summary including, as applicable: background; objectives; data sources; study eligibility criteria, participants, and interventions; study appraisal and synthesis methods; results; limitations; conclusions and implications of key findings; systematic review registration number. | 1                  |
| <b>INTRODUCTION</b>                |    |                                                                                                                                                                                                                                                                                                             |                    |
| Rationale                          | 3  | Describe the rationale for the review in the context of what is already known.                                                                                                                                                                                                                              | 1,2                |
| Objectives                         | 4  | Provide an explicit statement of questions being addressed with reference to participants, interventions, comparisons, outcomes, and study design (PICOS).                                                                                                                                                  | 2                  |
| <b>METHODS</b>                     |    |                                                                                                                                                                                                                                                                                                             |                    |
| Protocol and registration          | 5  | Indicate if a review protocol exists, if and where it can be accessed (e.g., Web address), and, if available, provide registration information including registration number.                                                                                                                               | 2                  |
| Eligibility criteria               | 6  | Specify study characteristics (e.g., PICOS, length of follow-up) and report characteristics (e.g., years considered, language, publication status) used as criteria for eligibility, giving rationale.                                                                                                      | 2                  |
| Information sources                | 7  | Describe all information sources (e.g., databases with dates of coverage, contact with study authors to identify additional studies) in the search and date last searched.                                                                                                                                  | 2                  |
| Search                             | 8  | Present full electronic search strategy for at least one database, including any limits used, such that it could be repeated.                                                                                                                                                                               | 2                  |
| Study selection                    | 9  | State the process for selecting studies (i.e., screening, eligibility, included in systematic review, and, if applicable, included in the meta-analysis).                                                                                                                                                   | 2                  |
| Data collection process            | 10 | Describe method of data extraction from reports (e.g., piloted forms, independently, in duplicate) and any processes for obtaining and confirming data from investigators.                                                                                                                                  | 2                  |
| Data items                         | 11 | List and define all variables for which data were sought (e.g., PICOS, funding sources) and any assumptions and simplifications made.                                                                                                                                                                       | 2                  |
| Risk of bias in individual studies | 12 | Describe methods used for assessing risk of bias of individual studies (including specification of whether this was done at the study or outcome level), and how this information is to be used in any data synthesis.                                                                                      | NA                 |
| Summary measures                   | 13 | State the principal summary measures (e.g., risk ratio, difference in means).                                                                                                                                                                                                                               | 2,3                |
| Synthesis of results               | 14 | Describe the methods of handling data and combining results of studies, if done, including measures of consistency (e.g., $I^2$ ) for each meta-analysis.                                                                                                                                                   | 2,3                |
| Risk of bias across studies        | 15 | Specify any assessment of risk of bias that may affect the cumulative evidence (e.g., publication bias, selective reporting within studies).                                                                                                                                                                | NA                 |
| Additional analyses                | 16 | Describe methods of additional analyses (e.g., sensitivity or subgroup analyses, meta-regression), if done, indicating which were pre-specified.                                                                                                                                                            | 2,3                |
| <b>RESULTS</b>                     |    |                                                                                                                                                                                                                                                                                                             |                    |
| Study selection                    | 17 | Give numbers of studies screened, assessed for eligibility, and included in the review, with reasons for exclusions at each stage, ideally with a flow diagram.                                                                                                                                             | 3, Figure 1        |
| Study characteristics              | 18 | For each study, present characteristics for which data were extracted (e.g., study size, PICOS, follow-up period) and provide the citations.                                                                                                                                                                | 1,2, Table 1       |
| Risk of bias within                | 19 | Present data on risk of bias of each study and, if available, any outcome level                                                                                                                                                                                                                             | NA                 |

|                               |    |                                                                                                                                                                                                          |                                   |
|-------------------------------|----|----------------------------------------------------------------------------------------------------------------------------------------------------------------------------------------------------------|-----------------------------------|
| studies                       |    | assessment (see item 12).                                                                                                                                                                                |                                   |
| Results of individual studies | 20 | For all outcomes considered (benefits or harms), present, for each study: (a) simple summary data for each intervention group (b) effect estimates and confidence intervals, ideally with a forest plot. | 4-7, Figure 2, Figure 4, Figure 5 |
| Synthesis of results          | 21 | Present results of each meta-analysis done, including confidence intervals and measures of consistency.                                                                                                  | 4-7, Figure 2, Figure 4, Figure 5 |
| Risk of bias across studies   | 22 | Present results of any assessment of risk of bias across studies (see Item 15).                                                                                                                          | NA                                |
| Additional analysis           | 23 | Give results of additional analyses, if done (e.g., sensitivity or subgroup analyses, meta-regression [see Item 16]).                                                                                    | Table 2, Figure 3                 |
| <b>DISCUSSION</b>             |    |                                                                                                                                                                                                          |                                   |
| Summary of evidence           | 24 | Summarize the main findings including the strength of evidence for each main outcome; consider their relevance to key groups (e.g., healthcare providers, users, and policy makers).                     | 7,8                               |
| Limitations                   | 25 | Discuss limitations at study and outcome level (e.g., risk of bias), and at review-level (e.g., incomplete retrieval of identified research, reporting bias).                                            | NA                                |
| Conclusions                   | 26 | Provide a general interpretation of the results in the context of other evidence, and implications for future research.                                                                                  | 9                                 |
| <b>FUNDING</b>                |    |                                                                                                                                                                                                          |                                   |
| Funding                       | 27 | Describe sources of funding for the systematic review and other support (e.g., supply of data); role of funders for the systematic review.                                                               | 9                                 |

**Supplementary figure 2.** Funnel plots for mortality risk in NAFLD patients: A) for the high versus low (reference) category of NAFLD fibrosis score, B) for the high versus intermediate/low category of NAFLD fibrosis score, C) for the high versus low (reference) category of APRI, D) for the high versus intermediate/low category of APRI, E) for the high versus low (reference) category of FIB4, F) for the high versus intermediate/low category of FIB4.

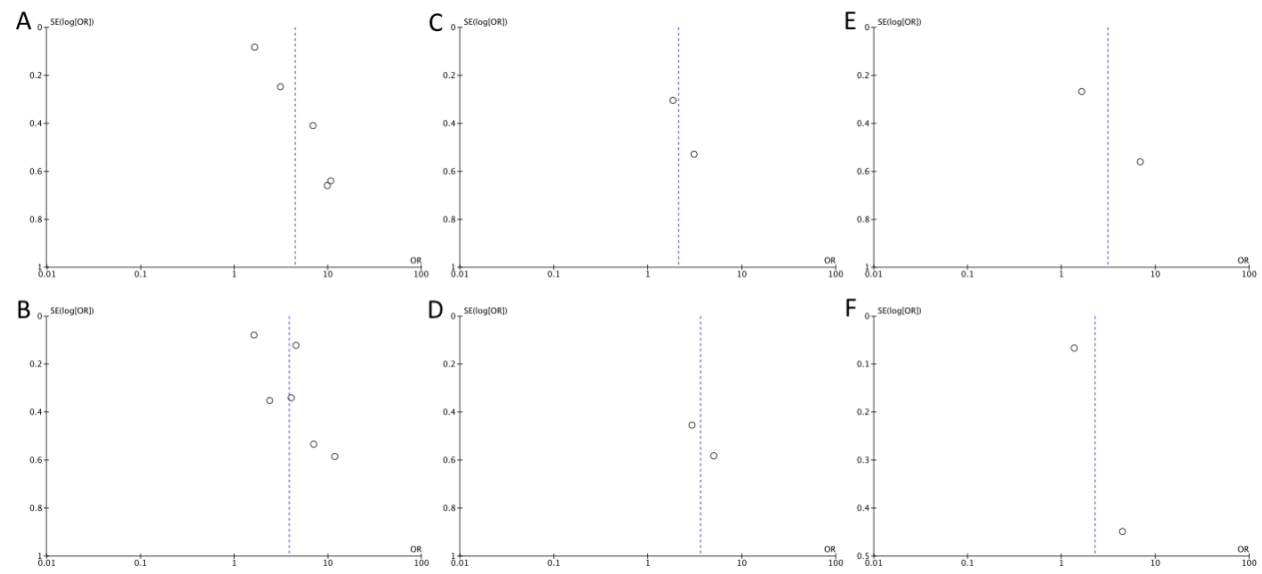

**Supplementary figure 3.** Dose-response association between APRI, FIB-4 and mortality risk in NAFLD patients. Solid lines represent risk ratio, dashed lines represent 95% confidence intervals.

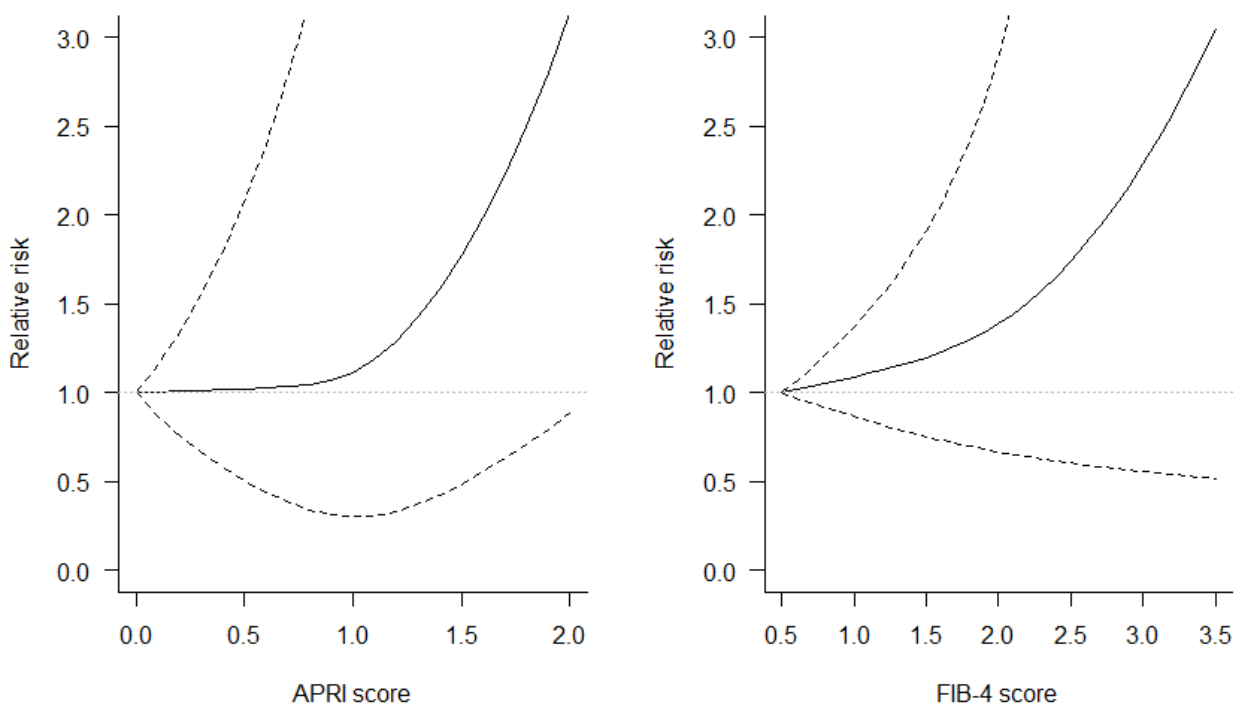

Supplement: Supplementary file 1 [file jcm-07-00219-s001.pdf]
